*Bruno Riou, M.D., Ph.D., Editor*

# Case Scenario: Tailored Sedation to the Individual Needs of the Intensive Care Unit Patient

Peter V. Sackey, M.D., Ph.D.,\* Lars I. Eriksson, M.D., Ph.D.,† Claes-Roland Martling, M.D., Ph.D.,‡ Peter J. Radell, M.D., Ph.D.§

**CME**

This article has been selected for the ANESTHESIOLOGY CME Program. Learning objectives and disclosure and ordering information can be found in the CME section at the front of this issue.

THE many challenges of modern multidisciplinary critical care require wakeful attention from those caring for critically ill patients. Increasingly sophisticated technology, as well as a deeper understanding of pathophysiology, challenges intensive care unit (ICU) physicians in a myriad of ways. The following case report exemplifies the use of overlapping disciplines to meet the challenge of promptly waking up a patient after 2 days of deep sedation in the ICU. The purpose of this case scenario is to highlight the value of planning tailored sedation for the individual ICU patient and situation.

\* Postdoctoral Fellow, † Professor, ‡ Associate Professor, Department of Anesthesiology, Surgical Services and Intensive Care Medicine, Karolinska University Hospital, Stockholm, Sweden. § Associate Professor, Department of Pediatric Anesthesia and Intensive Care, Karolinska University Hospital.

Received from the Department of Physiology and Pharmacology, Section for Anesthesiology and Intensive Care Medicine, Karolinska Institutet, Stockholm, Sweden. Submitted for publication June 26, 2010. Accepted for publication September 2, 2010. Support was provided through the regional agreement on medical training and clinical research (ALF) between Stockholm County Council, Stockholm, Sweden, and Karolinska Institutet. Funding was also provided by Per Sjöberg scholarship and by the Strategic Research Committee of Karolinska Institutet and Karolinska University Hospital, Stockholm, Sweden. Dr. Sackey has received lecture honoraria from Abbott Scandinavia, Stockholm, Sweden, and advisory honoraria from Baxter Global, Paris, France. Dr. Eriksson has received lecture and advisory honoraria from Abbott Scandinavia and Schering-Plough (part of Merck Inc., USA). The other authors state no potential conflicts of interest. The figures in this article were prepared by Annemarie B. Johnson, C.M.I., Medical Illustrator, Wake Forest University School of Medicine Creative Communications, Wake Forest University Medical Center, Winston-Salem, North Carolina.

Address correspondence to Dr. Radell: Department of Physiology and Pharmacology, Section for Anesthesiology and Intensive Care Medicine, Karolinska Institutet, Stockholm, Sweden. peter.radell@karolinska.se. This article may be accessed for personal use at no charge through the Journal Web site, [www.anesthesiology.org](http://www.anesthesiology.org).

## Case Report

A 22-yr-old woman diagnosed with papillary thyroid cancer was scheduled for thyroid surgery. The tumor penetrated the tracheal wall, necessitating extensive surgery, including the likely removal of several involved tracheal rings. The patient was preoperatively informed about the planned surgery and the likelihood of delayed extubation in the intensive care unit, as well as the need for restricted neck movements in the days after extubation.

To achieve as radical a resection of the tumor as possible, four tracheal rings were removed, and the left recurrent laryngeal nerve was sacrificed and anastomosed after removal of the tumor. As a result of anticipated postsurgical tension to the anterior part of the neck after primary suturing of the trachea, the surgical team requested that the patient remain intubated with her neck flexed for the first 36 postoperative h.

The patient was transferred intubated to the general ICU. She was kept sedated with propofol  $5 \text{ mg} \cdot \text{kg}^{-1} \cdot \text{h}^{-1}$ , midazolam  $5 \text{ mg/h}$ , and morphine  $6 \text{ mg/h}$  for the first night. Atracrium was started at  $10 \text{ mg/h}$ , with intermittent train-of-four monitoring, on the first postoperative evening to ensure complete immobility. To maintain a train-of-four rate of two twitches or less, the infusion of atracrium was increased to  $20 \text{ mg/h}$ . At the surgeon's request, nimodipine  $5 \text{ mg/h}$  was also started for the purpose of stimulating nerve regeneration after the nerve anastomosis. Noradrenaline was required at an initial rate of  $0.05 \mu\text{g} \cdot \text{kg}^{-1} \cdot \text{min}^{-1}$  to maintain a mean arterial pressure above  $65 \text{ mmHg}$ .

◆ This article is accompanied by an Editorial View. Please see: Payen J-F: Toward tailored sedation with halogenated anesthetics in the intensive care unit? ANESTHESIOLOGY 2010; 113:1268–9.

### **What Are the Goals of Sedation in ICU Patients?**

Patient comfort and safety are two important priorities of sedative and analgesic treatment in critically ill patients.<sup>1</sup> Pain and anxiety are reported by many patients after an ICU stay.<sup>2</sup> Pain and anxiety lead to increased central nervous sympathetic output, potentially resulting in cardiovascular problems, such as hypertension and tachycardia. Central respiratory activation leads to tachypnea and ventilator dyssynchrony, which may lead to hypoxia and hypercarbia in the mechanically ventilated critically ill patient. In addition, memories of pain, anxiety, and other negative feelings from the ICU may be associated with increased risk of posttraumatic stress disorder symptoms.<sup>3</sup>

*Patient comfort* implies that the ICU patient not experience severe pain, anxiety, or other adverse feelings. In cases where the patient cannot be made reasonably comfortable with analgesia and reassuring information, sedation may be needed.<sup>1</sup> In some patients, this need may arise during mechanical ventilation or during procedures and, at times, be accompanied by the use of neuromuscular blocking agents (NMBA).<sup>4,5</sup>

*Patient safety* relates in part to actions that jeopardize ongoing ICU treatment or to the risks of self-injury, inadvertent self-extubation, or catheter removal. Sedative treatment may be necessary to minimize the risk of such events or to facilitate adequate ventilation and oxygenation during mechanical ventilation.<sup>1</sup>

When treating patients with sedatives and analgesics to meet these goals, one challenge is to avoid oversedation because this may lead to well-recognized clinical problems, such as cardiorespiratory depression, with hypotension and bradycardia, or inadequate spontaneous ventilation and prolonged ventilator treatment.<sup>1</sup>

### **What Drugs Are Used for Sedation and Analgesia in Mechanically Ventilated ICU Patients?**

The drugs most commonly used for sedation during mechanical ventilation in ICU patients are either benzodiazepines (midazolam or lorazepam) or propofol, commonly combined with an opiate infusion for analgesia.<sup>4–7</sup> Midazolam is a short-acting benzodiazepine, frequently used for long-term sedation in intubated ICU patients. Lorazepam has slightly slower onset of effect and longer half-life and is commonly used in the United States for sedation during mechanical ventilation but rarely used in Europe.<sup>6</sup> Both drugs act *via* enhancement of GABA-ergic transmission and produce a state of anxiolysis and amnesia. Propofol is also commonly used for sedation and has the benefit of relatively short duration of action. Haloperidol is usually used as an empirical treatment for agitation, delirium, and hallucinations in ICU patients but rarely used alone for sedation.<sup>1</sup> Barbiturate infusions are primarily used in patients with increased intracranial pressure, but because of accumulation in fatty tissue, they are rarely used solely for sedative purposes. The  $\alpha_2$ -agonists clonidine and dexmedetomidine appear to be used increasingly for sedation alone or in combination with other sedatives.<sup>7–9</sup>

### **Continued Management of the Patient**

Because uncontrolled movements were considered to pose a risk for potential surgical complications, it was planned—for patient safety reasons—that the patient remain intubated and immobilized for 36 h postoperatively. Furthermore, reintubation after uncontrolled self-extubation could be technically difficult because of possible edema or hematoma after the tracheal surgery. The NMBA was administered for patient safety reasons, whereas sedation and analgesia were given primarily for patient comfort/amnesia. With NMBA administration, the initially prescribed deep sedation target (Motor Activity Assessment Scale<sup>10</sup> 0) could not be monitored, leading to high sedative doses to minimize the risk of awareness. At emergence from the drug-induced coma and muscle paralysis, it was vital that the patient regain full consciousness and muscle tone to maintain airway patency, particularly with regard to a likely left laryngeal recurrence paresis. Furthermore, it was important to minimize the risk of agitation and disorientation so the patient would cooperate at an early stage and not risk the surgical outcome by uncontrolled head movements.

With these goals in mind, discussion in the ICU continued as to how to best manage the patient's sedation. On postoperative day 1, it was clear that the ongoing therapy, although allowing deep sedation and immobilization, would probably not result in a prompt return to full wakefulness and cooperation, a goal needed to be achieved for successful extubation and spontaneous breathing without jeopardizing the surgical repair. Although this case was somewhat exceptional, situations are not rare where deep sedation is combined with the need for quick conversion to clear wakefulness, particularly in cases with postoperative airway concerns. Other alternatives might include drugs with rapid metabolism and offset (*e.g.*, propofol combined with remifentanyl). Our experience is that no therapy provides as quick a transition from deep sedation to wake-up as inhaled sedation. Thus, we decided to convert the administration of intravenous sedatives and NMBA to inhaled sedation with isoflurane. In addition, the sedation plan included the use of intravenous clonidine as a sedative adjunct if necessary at extubation. Although overt withdrawal symptoms were not anticipated, considering the relatively brief duration of sedation, there was concern that even a brief period of confusion or agitation during wake-up might risk the success of the surgical repair in this patient.

Isoflurane was delivered with the aid of the anesthetic conserving device (AnaConDa®; Sedana Medical AB, Stockholm, Sweden), initially at an infusion rate of 8 ml/h, with an end-tidal concentration target of 1.2%. Midazolam, propofol, and atracurium were tapered during the next 3 h before discontinuation, and morphine infusion was reduced to an hourly rate of 3 mg/h. During the period of parallel intravenous and inhaled sedation, noradrenaline infusion rate was  $0.11 \mu\text{g} \cdot \text{kg}^{-1} \cdot \text{min}^{-1}$  but could be reduced to  $0.04 \mu\text{g} \cdot \text{kg}^{-1} \cdot \text{min}^{-1}$  within hours. The next morning, 36 h postoperatively, the surgeons and the ICU team decided to inspect

the airway fiberoptically and possibly extubate the patient. For this purpose, the patient was taken to the operating room. After concluding that there was no swelling or hematoma posing a risk to extubation, the definitive decision to extubate the patient was taken. Within minutes of terminated sedation, the patient showed signs of emerging. Extubation was successful, with the patient breathing spontaneously before extubation and with adequate oxygenation and ventilation. She was noted to be somewhat restless and tachycardic and was therefore given an intravenous clonidine bolus of 75 + 75  $\mu$ g at the time of extubation. After returning from the operating room, additional clonidine 75 + 150 + 75  $\mu$ g was given to calm the patient. Morphine boluses and a morphine infusion of 1 mg/h were administered. Glycopyrrolate was given to reduce secretions. With this strategy, the patient remained lucid and cooperative in the hours after terminated sedation. She received paracetamol and morphine for postoperative pain and was discharged uneventfully to the surgical ward the next day.

### **What Was the Rationale for Changing the Patient's Sedation to Isoflurane and Clonidine?**

Recent clinical data indicate that sedation of ICU patients with benzodiazepines may contribute to confusion or overt delirium at termination of treatment.<sup>11,12</sup> In one study, the cumulative dose of lorazepam during the final 24 h of sedation was found to be an independent risk factor for the development of delirium.<sup>11</sup> Another study compared awakening from midazolam and propofol. In the treatment group, midazolam was replaced with propofol when extubation was anticipated within 24 h. In patients emerging from solely midazolam sedation, dangerous agitation (Sedation-Agitation Scale + 2) was more frequent than in those emerging from propofol sedation (54% *vs.* 8%).<sup>12</sup> In critically ill patients, midazolam infusions may lead to long and unpredictable wake-up times.<sup>13,14</sup> In patients with renal or hepatic failure, this is most evident, probably because of impaired metabolism and elimination and the accumulation of active metabolites.<sup>13,14</sup> High doses of propofol are believed to increase the risk of propofol infusion syndrome and are not recommended.<sup>15</sup> Prolonged use of NMBA in ICU patients is a well-described risk factor behind the development of prolonged neuromuscular block and muscle paralysis.<sup>16</sup> Such side effects are more likely to occur when NMBA with active metabolites are used and may not be possible to reverse with standard doses of anticholinesterase compounds.

The use of inhaled anesthetic agents for ICU sedation has been described in numerous case reports for the treatment of status asthmaticus, status epilepticus, or in patients difficult to sedate.<sup>17–19</sup> Prospective studies of inhaled anesthetic agents for critically ill or postoperative patients have shown good sedation efficacy at 0.2–0.5 minimum alveolar concentration and short, predictable wake-up times.<sup>13,19–22</sup> Desflurane sedation for delayed extubation after general surgery led to significantly shorter time to cooperation and time to extubation than propofol.<sup>21</sup> In another study comparing

propofol with sevoflurane after cardiac surgery, time to extubation and time to cooperation were shorter for sevoflurane-sedated patients than for propofol-sedated patients.<sup>22</sup> The short time to awakening and cooperation with inhaled anesthetic agents compared with intravenous drugs, despite deep sedation,<sup>13</sup> are probably related to a route of elimination independent of renal or hepatic function, which are frequently impaired in critically ill patients. Inhaled sedation with isoflurane appears to promote early cooperation<sup>13</sup> and possibly contributes to less unreal or hallucinatory memories than midazolam sedation.<sup>23</sup> Such memories have been associated with the development of posttraumatic stress disorder symptoms.<sup>24</sup>

The  $\alpha_2$ -agonist clonidine has been used in patients with alcohol withdrawal in the ICU<sup>25</sup> and as an adjunct to adult and pediatric sedation.<sup>26,27</sup> Generally,  $\alpha_2$ -agonists have little effect on respiratory drive<sup>28</sup> but may have indirect circulatory effects, such as reduced blood pressure and heart rate as a result of central inhibition of sympathetic output.<sup>29</sup> In clinical practice, clonidine, as the sole sedative during mechanical ventilation, is often not sufficient. Likewise, dexmedetomidine appears to be valuable for sedation but may not be sufficient alone to achieve deep sedation. In a recent study, normal sedation targets were achieved with dexmedetomidine to the same extent as midazolam or propofol, but dexmedetomidine was inferior with regard to maintaining a deep sedation target (Richmond Agitation-Sedation Score of 4 or less).<sup>30</sup> The authors concluded that the use of dexmedetomidine was “not suitable as the sole agent for deep sedation.”<sup>30</sup>

Recently,  $\alpha_2$ -agonists have been demonstrated to reduce withdrawal symptoms at termination of conventional sedation. In one study, clonidine was used to attenuate the behavioral and autonomic stress response, after termination of propofol-remifentanyl sedation, and to facilitate extubation.<sup>9</sup> In this observational study, 25 of 30 patients responded to bolus doses of clonidine, in that their increased heart rate, blood pressure, and oxygen consumption returned to values similar to those before terminating sedation. Doses were higher than usually prescribed (900  $\mu$ g and repeated if needed). In a study by Reade *et al.*, dexmedetomidine was compared with haloperidol for treating patients deemed otherwise ready for extubation but where agitated delirium precluded extubation.<sup>31</sup> Dexmedetomidine patients were extubated significantly faster than those receiving haloperidol.

### **Can Inhaled Anesthetic Agents Be Given Safely to Patients in the ICU?**

The use of inhaled anesthetic agents for sedation in the ICU is currently not routine and may give rise to some concerns. The delivery of inhaled anesthetic agents *via* modern ICU ventilators is not straightforward, and other concerns include ambient pollution in the ICU setting and the different traditions of anesthesia-trained *versus* nonanesthesia-trained ICU physicians.<sup>32,33</sup> Use of inhaled agents requires that practitioners be familiar with the physiologic effects and pharmacologic properties of these agents.

### Delivery of Inhaled Anesthetic Agents via Modern ICU Ventilators

Historically, delivery of inhaled anesthetic agents in the ICU has been possible using, among others, the Siemens 900C ventilator (Siemens-Elema; Maquet AB, Solna, Sweden) with a compatible vaporizer. However, modern, commercially available ICU ventilators do not have vaporizers, making delivery cumbersome with different adaptations that have been described.<sup>34</sup> In our case, a miniature vaporizer, the AnaConDa®, was used (fig. 1).<sup>13</sup> The device enables delivery of inhaled anesthetics in the ICU and with any ventilator. It is a modified heat-moisture exchanger with a vaporizer rod and an adsorbing active carbon filter. The device is placed between the Y-piece of the respiratory circuit and the endotracheal tube and has an outlet for gas sampling (fig. 1). Anesthetic liquid is infused from a syringe pump and vaporized passively in the device during inspiration. Approximately 90% of the exhaled anesthetic agent is adsorbed by the active carbon filter and recycled to the patient with the next breath. The remaining anesthetic agent passes the filter and leaves the expiratory outlet of the ventilator where it can be scavenged. The desired inspiratory and end-tidal concentrations are acquired by adjustment of the infusion rate of isoflurane/sevoflurane to the AnaConDa®. The AnaConDa® has a total volume of 100 ml, exceeding that of most standard heat-moisture exchangers, and in our experience, the increased dead space precludes its use as designed in small patients, typically less than 30 kg. In small adults and children, an alternate placement at the inspiratory limb with no re-breathing has been described.<sup>35</sup> The AnaConDa® is only commercially available in the European Union. Desflurane cannot be administered *via* the AnaConDa® because of its low boiling point. Anesthesia machines are becoming increasingly refined, and a future development may be adult and pediatric ICU ventilators with the possibility of delivering and scavenging anesthetic agents.

### Environmental Aspects of Inhaled Anesthetic Agents in the ICU Setting

During inhaled sedation, scavenging of waste gas can be performed actively or passively. Gas from the ventilator and the gas analyzer can be led to a central evacuation system or to a specially designed, commercially available, active carbon canister. Studies of ambient anesthetic gas concentrations during inhaled isoflurane and sevoflurane sedation have demonstrated concentrations lower than the recommended exposure limits.<sup>20,36</sup> Recommended exposure limits vary between countries but are typically between 2 and 50 ppm for long-term exposure, and concentrations less than these thresholds have not been associated with risks of staff toxicity. Animal toxicity has been demonstrated at no less than 6,000 ppm (0.6%) with congenital malformations in mice exposed to these concentrations of isoflurane daily during the early phases of pregnancy.<sup>37</sup>

### Anesthesia Training and Inhaled Anesthetic Agent Delivery in the ICU Setting

The vast majority of Swedish ICU physicians are anesthesia-trained, making them familiar with inhaled anesthetic agents, gas concentration monitoring, and the minimum alveolar concentration concept. In other settings, nonanesthesia-trained ICU physicians may be reluctant or possibly not even permitted to use this therapeutic option for sedation of ICU patients. Although propofol has been readily adopted from the anesthesia setting into the ICU, inhaled anesthetics may be more strongly linked to anesthesiology as a medical discipline.<sup>32,33</sup> However, general anesthesia can be achieved with an intravenous anesthetic drug, such as propofol, and sedation can be achieved with an inhaled anesthetic agent. Delivery and elimination routes are probably more notable differences between intravenous and inhaled anesthetics than the pharmacodynamic profiles. Another difference of note is the ability to

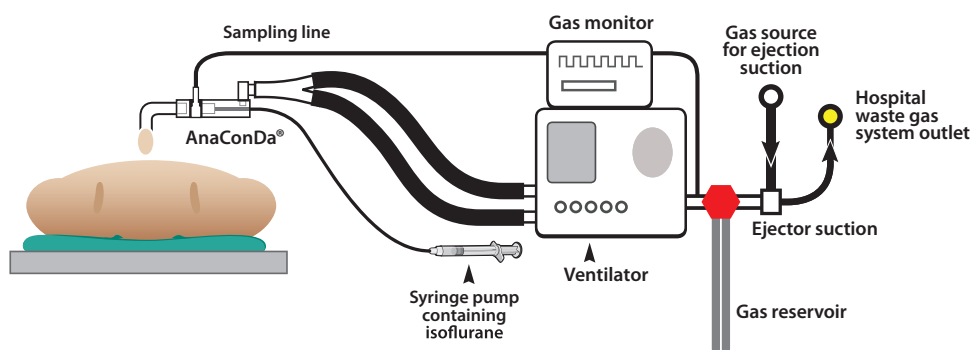

**Fig. 1.** Schematic representation of the adapted respiratory circuit, including the AnaConDa®, between to endotracheal tube and the Y-connector to administer the inhaled anesthetics isoflurane or sevoflurane. The system includes aspects not generally found in the intensive care unit setting: (1) gas sampling and monitoring to easily adjust administered concentration/dose to achieve desired end-tidal concentration and (2) a scavenging system for elimination of anesthetic agent leaving the circuit (AnaConDa®; Sedana Medical AB, Stockholm, Sweden). Modified, with permission, from Sackey PV, Martling CR, Granath F, Radell PJ: Prolonged isoflurane sedation of intensive care unit patients with the Anesthetic Conserving Device. *Crit Care Med* 2004; 32:2241–6.<sup>13</sup>



monitor inhaled anesthetic agent concentrations online. With repeated in-house training of all staff, the 6-yr experience of inhaled isoflurane sedation for selected patients in our general ICU has been uneventful, with titration and monitoring performed mostly by nonanesthesia-trained nursing staff. In countries with more diverse background training, there may be need for a close working relationship between nonanesthesia-trained intensivists and anesthesiologists for inhaled anesthetic agent sedation to be considered a therapeutic option for ICU patients.

### **“One Size Fits All” or Tailored Sedation: A Role for the Anesthesiologist?**

Although patient comfort and safety may be the main goals of sedation, the axiom *primum non nocere* needs also to be borne in mind at all times. The choice of sedative treatment and monitoring is being acknowledged as a decision with great implications for the outcome of critically ill patients.<sup>38</sup> High doses of midazolam may be necessary to sedate a child but may lead to several days of prolonged ventilator treatment in an elderly patient or a patient with renal and liver dysfunction. Specific electrocardiogram changes may contraindicate the use of haloperidol or  $\alpha_2$ -agonists. Young age and sepsis may make the use of high doses of propofol unsuitable. To avoid iatrogenic adverse/prolonged effects of sedative agents and analgesics, awareness of how critical illness and multiple organ failure affect the pharmacodynamics and pharmacokinetics of the drug is central (see table 1). For example, vasodilating effects of inhaled agents may have both positive and negative effects

in various critical care settings and must be considered in the individual clinical context. Our experience, however, has been that the hemodynamic effects of isoflurane at sedation doses are generally mild and rarely preclude their use. Consideration of pharmacokinetic and pharmacodynamic aspects in the individual case is a critical part of daily anesthesiology practice.

Different drug management strategies have been proven to reduce iatrogenic oversedation, with documented clinical outcome benefits. These strategies include drug rotation,<sup>12</sup> goal-directed frequent drug dose titration,<sup>39</sup> daily sedative and analgesic interruption,<sup>40</sup> combined sedative interruption and spontaneous breathing tests,<sup>41</sup> and pain monitoring.<sup>42</sup> Thus, physicians are not only challenged in what drugs to use but also on how administration and discontinuation are managed. As the patient's status changes during the ICU stay, vigilance is necessary to adapt treatment promptly to best provide comfort and safety without harming the patient. In a Canadian survey of ICU sedation routines, patients were more likely to be treated with a protocol and sedation scale if the ICU physician had anesthesia training compared with a nonanesthesia-trained ICU physician.<sup>4</sup>

A broad arsenal of therapeutic options—including intravenous and inhaled anesthetic agents—combined with active decisions, based on patient needs and ongoing treatments, is likely to improve sedation-related outcomes for ICU patients. A future scenario should possibly be to create a tailored sedation and analgesia plan (fig. 2) for each patient at the outset of sedative use, revisited during the course of the treatment. In some countries with division of anesthesia and

**Table 1.** Main Advantages and Disadvantages of Various Agents Used for ICU Sedation

| Drug or Drug Class                                                 | Main Advantages                                                                                                         | Main Side Effects/Risks                                                                                                                                   |
|--------------------------------------------------------------------|-------------------------------------------------------------------------------------------------------------------------|-----------------------------------------------------------------------------------------------------------------------------------------------------------|
| Benzodiazepines<br>(midazolam/lorazepam)                           | Relative hemodynamic stability<br>Amnesia<br>Anticonvulsant<br>Long experience and safety profile                       | Prolonged/unpredictable duration due to drug accumulation/organ failure<br>Delirium/postsedation agitation<br>Tolerance and withdrawal with prolonged use |
| Propofol                                                           | Relatively short-acting<br>No marked change of elimination in hepatic or renal failure<br>Reliable dose-effect relation | Hemodynamic effects<br>Hyperlipidemia<br>Propofol infusion syndrome                                                                                       |
| Inhaled anesthetic agents<br>(isoflurane, sevoflurane, desflurane) | Short-acting<br>Elimination independent of hepatic or renal function<br>Monitored drug concentration                    | Hemodynamic effects<br>Malignant hyperthermia<br>Unclear effects with prolonged use                                                                       |
| $\alpha_2$ -Agonists                                               | Reduced autonomic stress response<br>Minimal respiratory depression<br>Rousability                                      | Insufficient for deep sedation<br>Bradycardia/hypotension                                                                                                 |
| Haloperidol                                                        | Reduced motor agitation                                                                                                 | Extrapyramidal side effects<br>Long-QT-syndrome/arrhythmias                                                                                               |
| Opiates                                                            | Pain relief<br>Mild sedation                                                                                            | Respiratory depression<br>Gut immobility<br>Tolerance and withdrawal with prolonged use                                                                   |

ICU = intensive care unit.

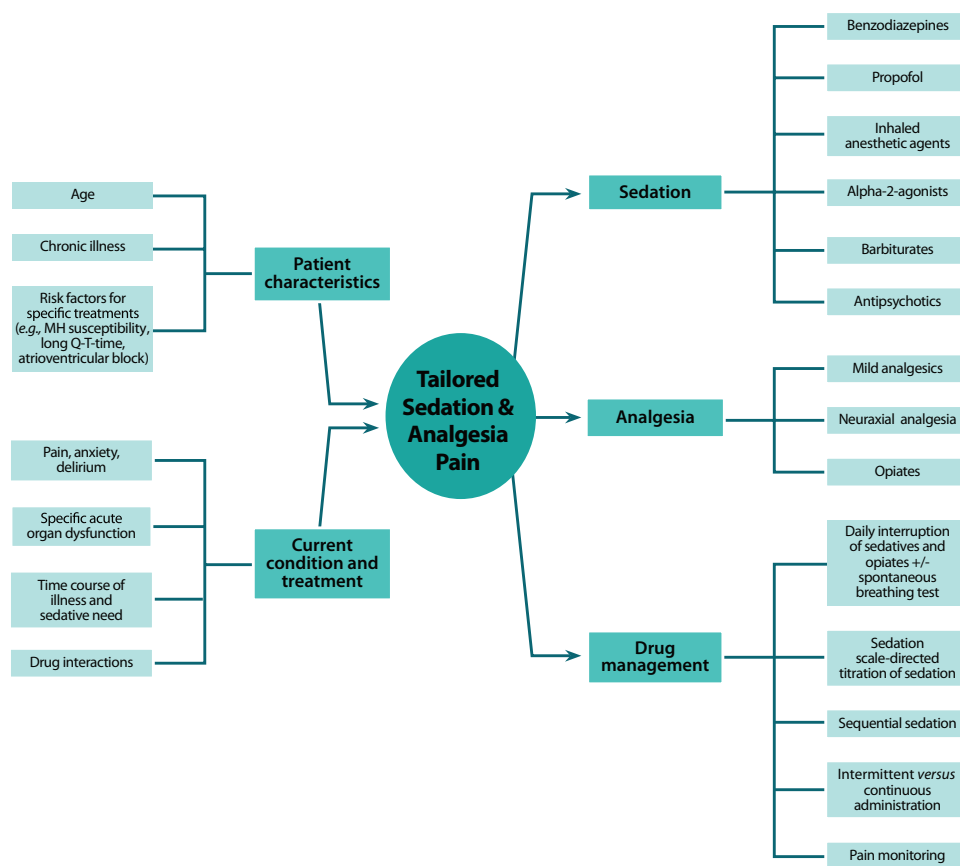

**Fig. 2.** A suggested approach for tailoring sedation and analgesia in intensive care unit patients. This approach includes consideration of the patient's unique characteristics as well as the special requirements of different critical care illnesses in determining and executing a plan for sedation, including the various available drug classes and sedation techniques. MH = malignant hyperthermia.

critical care, it may be that these two worlds need to converge to reach this goal of tailored sedation for the critically ill patient.

### Knowledge Gap and Future Research

Although long-term inhaled sedation in adult ICU patients is promising so far, potential toxicity of long-term (days-weeks) exposure to inhaled anesthetic agents has not been studied systematically, and currently, relatively few patients have been exposed to such long-term treatment. Currently, the use of inhaled sedation for ICU patients is off-label. Further research is needed to investigate potential long-term toxicity, as well as cost-benefit aspects, before inhaled anesthetic agents can be more widely used. In children, some data indicate that there are reversible neurologic symptoms after isoflurane sedation.<sup>35,43</sup> The youngest children appear to be at greatest risk of ataxia, tremor, and clonus, symptoms that subside within days.<sup>43</sup> The clinical significance of these transient motor symptoms is currently unclear and needs to be studied, as well as the possible occurrence with other anesthetics and sedatives.

Furthermore, safety issues regarding different anesthetic agent delivery methods (for example, the AnaConDa® *vs.*

conventional vaporizer technique) in adults and children need further study.

Although future studies comparing the efficacy and safety profiles of new sedative agents are needed, different drug management strategies with similar benefit also need comparison. For example, there is no study comparing regular titration of sedation<sup>39</sup> and daily interruption of sedatives.<sup>40</sup>

Long-term outcome after sedation has recently come into focus.<sup>23,44,45</sup> Besides immediate efficacy and side effects, long-term patient-reported outcomes—including aspects such as recovery of cognitive functions, ICU memory panorama, and psychologic morbidity after different sedative drugs or regimens—should be an integral part of future ICU sedation trials.

### References

- Jacobi J, Fraser GL, Coursin DB, Riker RR, Fontaine D, Wittbrodt ET, Chalfin DB, Masica MF, Bjerke HS, Coplin WM, Crippen DW, Fuchs BD, Kelleher RM, Marik PE, Nasraway SA Jr, Murray MJ, Peruzzi WT, Lumb PD, Task Force of the American College of Critical Care Medicine (ACCM) of the Society of Critical Care Medicine (SCCM), American Society of Health-System Pharmacists (ASHP), American College of Chest Physicians: Clinical practice guidelines for the sus-

- tained use of sedatives and analgesics in the critically ill adult. *Crit Care Med* 2002; 30:119–41
2. Rotondi AJ, Chelluri L, Sirio C, Mendelsohn A, Schulz R, Belle S, Im K, Donahoe M, Pinsky MR: Patients' recollections of stressful experiences while receiving prolonged mechanical ventilation in an intensive care unit. *Crit Care Med* 2002; 30:746–52
  3. Schelling G, Stoll C, Haller M, Briegel J, Manert W, Hummel T, Lenhart A, Heyduck M, Polasek J, Meier M, Preuss U, Bullinger M, Schüffel W, Peter K: Health-related quality of life and posttraumatic stress disorder in survivors of the acute respiratory distress syndrome. *Crit Care Med* 1998; 26:651–9
  4. Mehta S, Burry L, Fischer S, Martinez-Motta JC, Hallett D, Bowman D, Wong C, Meade MO, Stewart TE, Cook DJ, Canadian Critical Care Trials Group: Canadian survey of the use of sedatives, analgesics, and neuromuscular blocking agents in critically ill patients. *Crit Care Med* 2006; 34:374–80
  5. Rhoney DH, Murry KR: National survey of the use of sedating drugs, neuromuscular blocking agents, and reversal agents in the intensive care unit. *J Intensive Care Med* 2003; 18:139–45
  6. Soliman HM, Mélot C, Vincent JL: Sedative and analgesic practice in the intensive care unit: The results of a European survey. *Br J Anaesth* 2001; 87:186–92
  7. Wunsch H, Kahn JM, Kramer AA, Wagener G, Li G, Sladen RN, Rubenfeld GD: Dexmedetomidine in the care of critically ill patients from 2001 to 2007: An observational cohort study. *ANESTHESIOLOGY* 2010; 113:386–94
  8. Rubino AS, Onorati F, Caroleo S, Galato E, Nucera S, Amantea B, Santini F, Renzulli A: Impact of clonidine administration on delirium and related respiratory weaning after surgical correction of acute type-A aortic dissection: Results of a pilot study. *Interact Cardiovasc Thorac Surg* 2010; 10:58–62
  9. Liatsi D, Tsapas B, Pampori S, Tsagourias M, Pneumatikos I, Matamis D: Respiratory, metabolic and hemodynamic effects of clonidine in ventilated patients presenting with withdrawal syndrome. *Intensive Care Med* 2009; 35:275–81
  10. Devlin JW, Boleski G, Mlynarek M, Nerenz DR, Peterson E, Jankowski M, Horst HM, Zarowitz BJ: Motor Activity Assessment Scale: A valid and reliable sedation scale for use with mechanically ventilated patients in an adult surgical intensive care unit. *Crit Care Med* 1999; 27:1271–5
  11. Pandharipande P, Shintani A, Peterson J, Pun BT, Wilkinson GR, Dittus RS, Bernard GR, Ely EW: Lorazepam is an independent risk factor for transitioning to delirium in intensive care unit patients. *ANESTHESIOLOGY* 2006; 104:21–6
  12. Saito M, Terao Y, Fukusaki M, Makita T, Shibata O, Sumikawa K: Sequential use of midazolam and propofol for long-term sedation in postoperative mechanically ventilated patients. *Anesth Analg* 2003; 96:834–8
  13. Sackey PV, Martling CR, Granath F, Radell PJ: Prolonged isoflurane sedation of intensive care unit patients with the Anesthetic Conserving Device. *Crit Care Med* 2004; 32:2241–6
  14. Bauer TM, Ritz R, Haberthür C, Ha HR, Hunkeler W, Sleight AJ, Scollo-Lavizzari G, Haefeli WE: Prolonged sedation due to accumulation of conjugated metabolites of midazolam. *Lancet* 1995; 346:145–7
  15. Vasile B, Rasulo F, Candiani A, Latronico N: The pathophysiology of propofol infusion syndrome: A simple name for a complex syndrome. *Intensive Care Med* 2003; 29:1417–25
  16. Watling SM, Dasta JF: Prolonged paralysis in intensive care unit patients after the use of neuromuscular blocking agents: A review of the literature. *Crit Care Med* 1994; 22:884–93
  17. Kofke WA, Young RS, Davis P, Woelfel SK, Gray L, Johnson D, Gelb A, Meeker R, Warner DS, Pearson KS: Isoflurane for refractory status epilepticus: A clinical series. *ANESTHESIOLOGY* 1989; 71:653–9
  18. Maltais F, Sovilj M, Goldberg P, Gottfried SB: Respiratory mechanics in status asthmaticus. Effects of inhalational anesthesia. *Chest* 1994; 106:1401–6
  19. L'her E, Dy L, Pili R, Prat G, Tonnelier JM, Lefevre M, Renault A, Boles JM: Feasibility and potential cost/benefit of routine isoflurane sedation using an anesthetic-conserving device: A prospective observational study. *Respir Care* 2008; 53:1295–303
  20. Migliari M, Bellani G, Rona R, Isgrò S, Vergnano B, Mauri T, Patroniti N, Pesenti A, Foti G: Short-term evaluation of sedation with sevoflurane administered by the anesthetic conserving device in critically ill patients. *Intensive Care Med* 2009; 35:1240–6
  21. Meiser A, Sirtl C, Bellgardt M, Lohmann S, Garthoff A, Kaiser J, Hügler P, Laubenthal HJ: Desflurane compared with propofol for postoperative sedation in the intensive care unit. *Br J Anaesth* 2003; 90:273–80
  22. Röhm KD, Wolf MW, Schöllhorn T, Schellhaass A, Boldt J, Piper SN: Short-term sevoflurane sedation using the Anaesthetic Conserving Device after cardiothoracic surgery. *Intensive Care Med* 2008; 34:1683–9
  23. Sackey PV, Martling CR, Carlswärd C, Sundin O, Radell PJ: Short- and long-term follow-up of intensive care unit patients after sedation with isoflurane and midazolam—a pilot study. *Crit Care Med* 2008; 36:801–6
  24. Jones C, Griffiths RD, Humphris G, Skirrow PM: Memory, delusions, and the development of acute posttraumatic stress disorder-related symptoms after intensive care. *Crit Care Med* 2001; 29:573–80
  25. Ip Yam PC, Forbes A, Kox WJ: Clonidine in the treatment of alcohol withdrawal in the intensive care unit. *Br J Anaesth* 1992; 68:106–8
  26. Böhler H, Bach A, Layer M, Werning P: Clonidine as a sedative adjunct in intensive care. *Intensive Care Med* 1990; 16:265–6
  27. Arenas-López S, Riphagen S, Tibby SM, Durward A, Tomlin S, Davies G, Murdoch IA: Use of oral clonidine for sedation in ventilated paediatric intensive care patients. *Intensive Care Med* 2004; 30:1625–9
  28. Bailey PL, Sperry RJ, Johnson GK, Eldredge SJ, East KA, East TD, Pace NL, Stanley TH: Respiratory effects of clonidine alone and combined with morphine, in humans. *ANESTHESIOLOGY* 1991; 74:43–8
  29. Isaac L: Clonidine in the central nervous system: Site and mechanism of hypotensive action. *J Cardiovasc Pharmacol* 1980; 2 (suppl 1):S5–19
  30. Ruokonen E, Parviainen I, Jakob SM, Nunes S, Kaukonen M, Shepherd ST, Sarapohja T, Bratty JR, Takala J, "Dexmedetomidine for Continuous Sedation" Investigators: Dexmedetomidine versus propofol/midazolam for long-term sedation during mechanical ventilation. *Intensive Care Med* 2009; 35:282–90
  31. Reade MC, O'Sullivan K, Bates S, Goldsmith D, Ainslie WR, Bellomo R: Dexmedetomidine vs. haloperidol in delirious, agitated, intubated patients: A randomised open-label trial. *Crit Care* 2009; 13:R75
  32. Maccioli GA, Cohen NH: General anesthesia in the intensive care unit? Is it ready for "prime time"? *Crit Care Med* 2005; 33:687–8
  33. Treggiari MM: Extending the use of inhaled anesthetics beyond the operating room: A giant snake creeping into the intensive care unit. *Respir Care* 2008; 53:1280–2
  34. McIndoe AK, Stewart P, Wilson IH: Drawover vaporizers for sedation in intensive care. *Intensive Care Med* 1997; 23:704–7
  35. Sackey PV, Martling CR, Radell PJ: Three cases of PICU sedation with isoflurane delivered by the 'AnaConDa'. *Paediatr Anaesth* 2005; 15:879–85
  36. Sackey PV, Martling CR, Nise G, Radell PJ: Ambient isoflurane pollution and isoflurane consumption during intensive care unit sedation with the Anesthetic Conserving Device. *Crit Care Med* 2005; 33:585–90

37. Mazze RI, Wilson AI, Rice SA, Baden JM: Fetal development in mice exposed to isoflurane. *Teratology* 1985; 32:339-45
38. Wunsch H, Kress JP: A new era for sedation in ICU patients. *JAMA* 2009; 301:542-4
39. Brook AD, Ahrens TS, Schaiff R, Prentice D, Sherman G, Shannon W, Kollef MH: Effect of a nursing-implemented sedation protocol on the duration of mechanical ventilation. *Crit Care Med* 1999; 27:2609-15
40. Kress JP, Pohlman AS, O'Connor MF, Hall JB: Daily interruption of sedative infusions in critically ill patients undergoing mechanical ventilation. *N Engl J Med* 2000; 342:1471-7
41. Girard TD, Kress JP, Fuchs BD, Thomason JW, Schweickert WD, Pun BT, Taichman DB, Dunn JG, Pohlman AS, Kinniry PA, Jackson JC, Canonico AE, Light RW, Shintani AK, Thompson JL, Gordon SM, Hall JB, Dittus RS, Bernard GR, Ely EW: Efficacy and safety of a paired sedation and ventilator weaning protocol for mechanically ventilated patients in intensive care (Awakening and Breathing Controlled trial): A randomised controlled trial. *Lancet* 2008; 371:126-34
42. Payen JF, Bosson JL, Chanques G, Mantz J, Labarere J, DOLOREA Investigators: Pain assessment is associated with decreased duration of mechanical ventilation in the intensive care unit: A post Hoc analysis of the DOLOREA study. *ANESTHESIOLOGY* 2009; 111:1308-16
43. Ariyama J, Hayashida M, Shibata K, Sugimoto Y, Imanishi H, O-oi Y, Kitamura A: Risk factors for the development of reversible psychomotor dysfunction following prolonged isoflurane inhalation in the general intensive care unit. *J Clin Anesth* 2009; 21:567-73
44. Jackson JC, Girard TD, Gordon SM, Thompson JL, Shintani AK, Thomason JW, Pun BT, Canonico AE, Dunn JG, Bernard GR, Dittus RS, Ely EW: Long-term cognitive and psychological outcomes in the awakening and breathing controlled trial. *Am J Respir Crit Care Med* 2010; 182:183-91
45. Kress JP, Gehlbach B, Lacy M, Pliskin N, Pohlman AS, Hall JB: The long-term psychological effects of daily sedative interruption on critically ill patients. *Am J Respir Crit Care Med* 2003; 168:1457-61

## ANESTHESIOLOGY REFLECTIONS

### A Taste of Sim's *Heritage of Anesthesia*

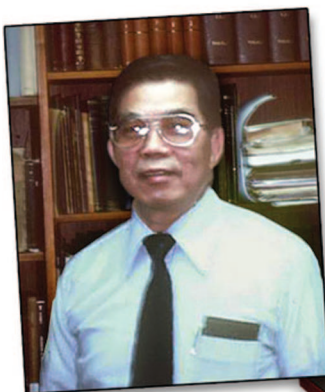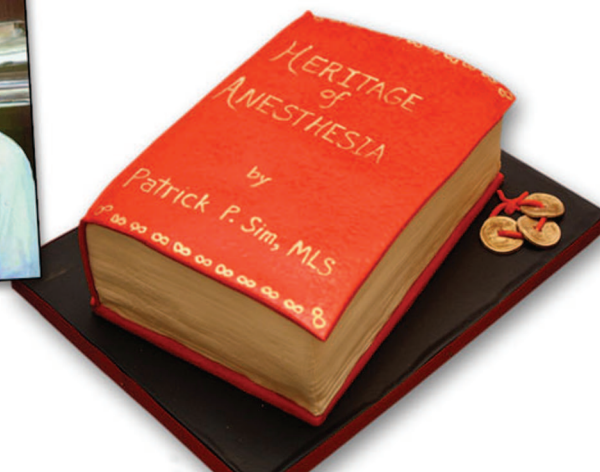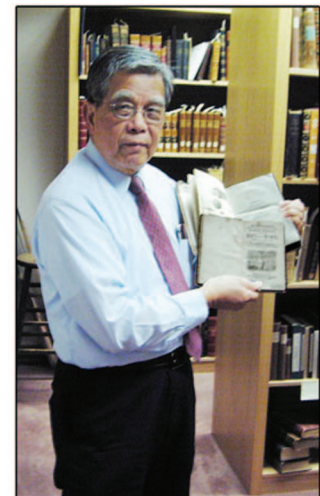

From the very beginning of his library career back in 1971, Patrick Pui-Kam Sim, M.L.S. (1939–2010), was enchanted by antiquarian books housed at the American Society of Anesthesiologists' Wood Library-Museum of Anesthesiology. Photographed on the left (in 1991) and on the right (in 2004) by the curator, "Pat" Sim relished his every moment in the K. Garth Huston, Sr. Rare Book Room. Leafing through the old tomes, Pat resolved that, one day, he would annotate a bibliography with essential information gleaned from each revered volume. Before terminal illness claimed the life of the Paul M. Wood Distinguished Librarian Emeritus, Patrick Sim would taste a cake decorated by the curator's wife with the title Pat had planned for his masterwork, *Heritage of Anesthesia*, a publication that he would never live to see. . . . (Copyright © the American Society of Anesthesiologists, Inc. This image appears in color in the *Anesthesiology Reflections* online collection available at [www.anesthesiology.org](http://www.anesthesiology.org).)

George S. Bause, M.D., M.P.H., Honorary Curator, ASA's Wood Library-Museum of Anesthesiology, Park Ridge, Illinois, and Clinical Associate Professor, Case Western Reserve University, Cleveland, Ohio. [UJYC@aol.com](mailto:UJYC@aol.com).
